# Supplementary material for: TRIM-mediated precision autophagy targets cytoplasmic regulators of innate immunity
Source: PubMed Central journal article supplement — J Cell Biol. 2015 Sep 14;210(6):973–89. doi: 10.1083/jcb.201503023 (PMC4576868; doi:10.1083/jcb.201503023), 2015-09-14
Supplement: supp_jcb.201503023_JCB_201503023_sm.pdf [file supp_jcb.201503023_JCB_201503023_sm.pdf]

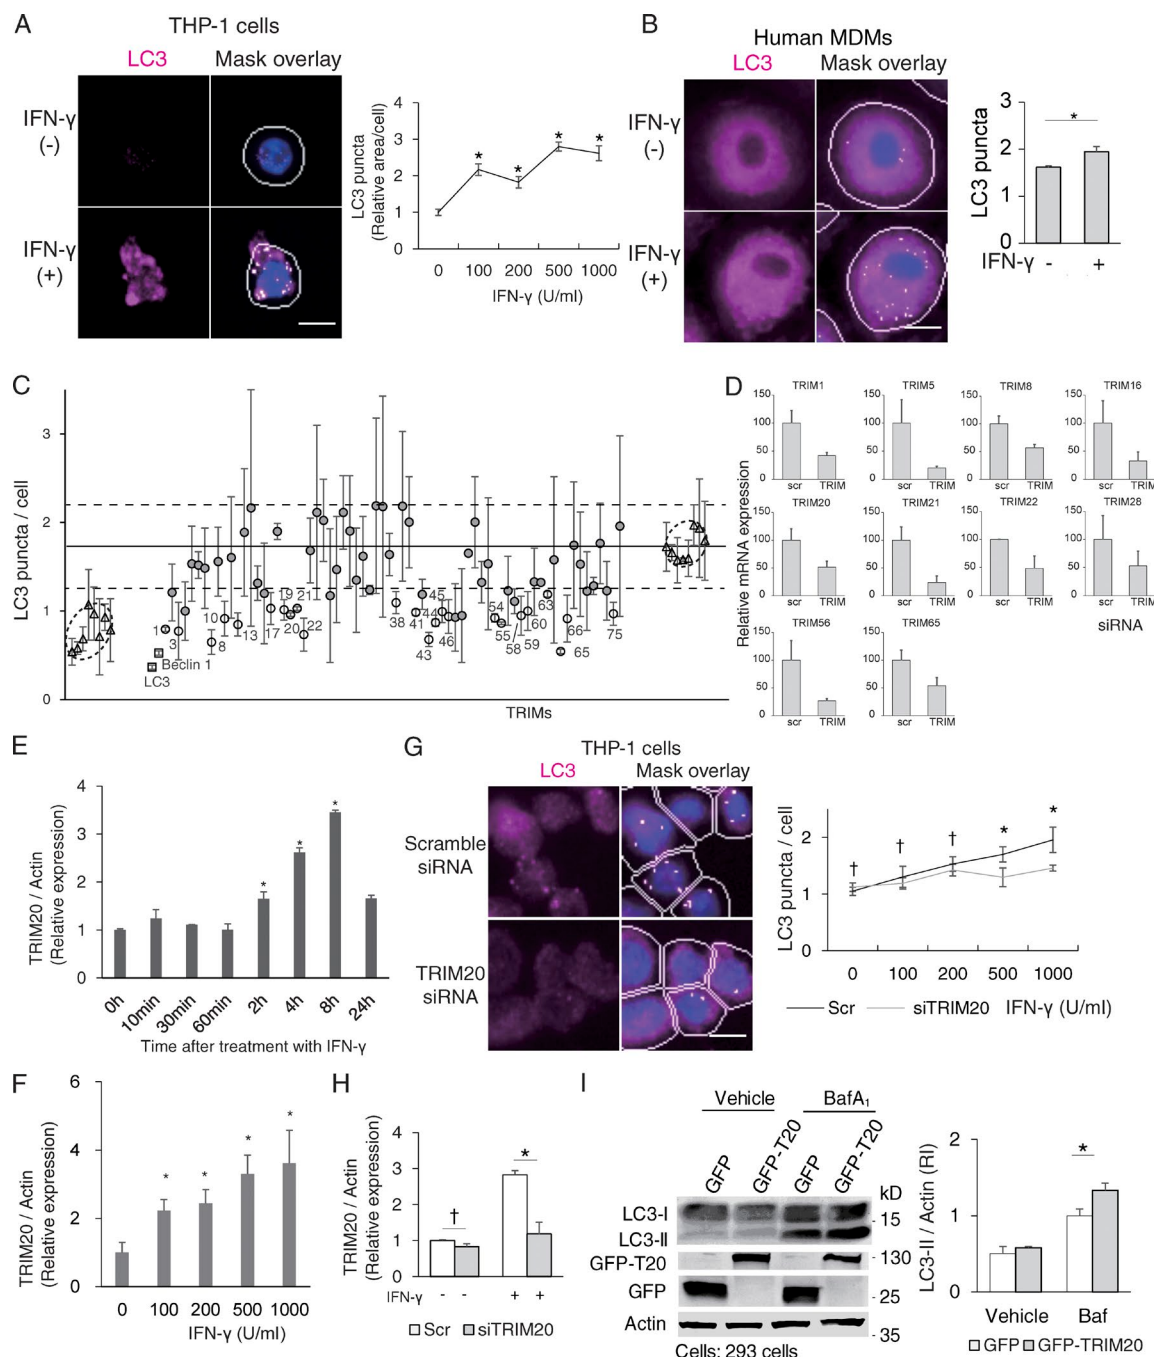

Figure S1. **TRIMs regulate IFN- $\gamma$ -induced autophagy.** (A and B) HC image analysis of LC3 puncta in THP-1 cells (A) or human MDM cells (B) treated with IFN- $\gamma$  for 4 h. HC and mask overlays are as in Fig. 1. White outlined profiles are program-assigned masks (large outlines are primary objects/cells; smaller masks are outlines of secondary objects/LC3 $^{+}$  autophagic profiles). (C) Screen data from Fig. 1 B showing average  $\pm$  range. (D) Knockdown efficacy of TRIMs were determined by RT-PCR. (E and F) THP-1 cells were treated with escalating doses of IFN- $\gamma$  for 4 h (E) or 1,000 U/ml of IFN- $\gamma$  for indicated times (F), and TRIM20 mRNA levels were determined by quantitative RT-PCR. Values are standardized to no IFN- $\gamma$  control (E) or 0 h time point (F). (G) THP-1 cells were subjected to TRIM20 or scrambled siRNA, treated with IFN- $\gamma$  for 4 h, and HC analysis performed. (H) Knockdown of TRIM20 mRNA levels was examined by quantitative RT-PCR. Values are standardized to control (Scr, scrambled; no IFN- $\gamma$ ). (I) LC3-II conversion in HEK293 cells transfected with GFP-TRIM20 (T20) or GFP. Data, means  $\pm$  SE;  $n \geq 3$  experiments, except in C. Bars, 5  $\mu$ m. \*,  $P < 0.05$ ; †,  $P \geq 0.05$  († test in B or ANOVA in other panels).

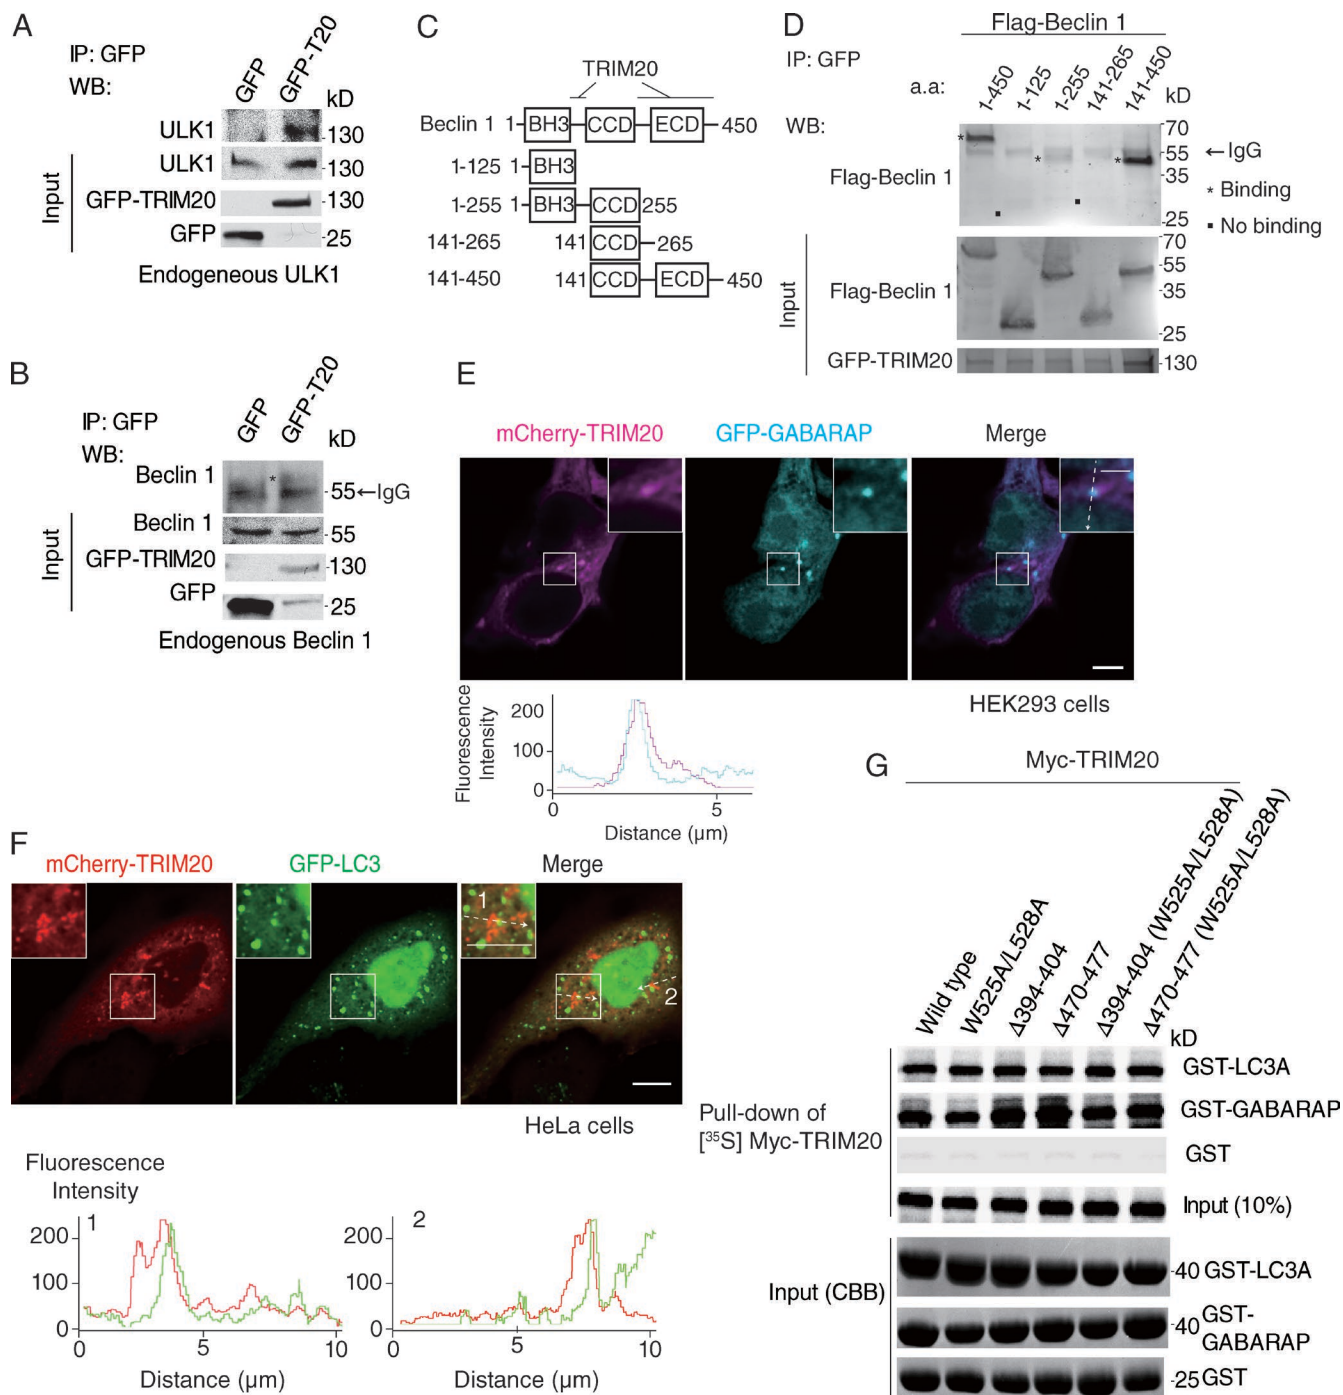

Figure S2. **TRIM20 interacts with ULK1, Beclin 1, and mAtg8s.** (A and B) Coimmunoprecipitation analysis of GFP-TRIM20 with endogenous ULK1 (A) or Beclin 1 (B) in HEK293 cells extracts. (C) Beclin 1 domains and deletion constructs used. (D) Coimmunoprecipitation analysis of interactions between deletion variants of Flag-Beclin 1 (asterisks and squares in the top blot denote presence or absence of Flag-Beclin 1, respectively) and GFP-TRIM20 in HEK293 cells. (E) Confocal microscopy of HEK293 cells coexpressing mCherry-TRIM20 with GFP-GABARAP. Line tracings correspond to dashed line. (F) Confocal microscopy of HeLa cells coexpressing mCherry-TRIM20 with GFP-LC3B in the presence of bafilomycin A1. Line tracings correspond to numbered dashed lines. (G) GST pull-down analysis of interaction between radiolabeled Myc-TRIM20 harboring single or double mutants (corresponding to Fig. 4 D) and GST-GABARAP. Data representative of three independent experiments. IP, immunoprecipitation; WB, Western blot. Bars: (E, main images) 5 μm; (E, insets) 2 μm; (F) 10 μm.

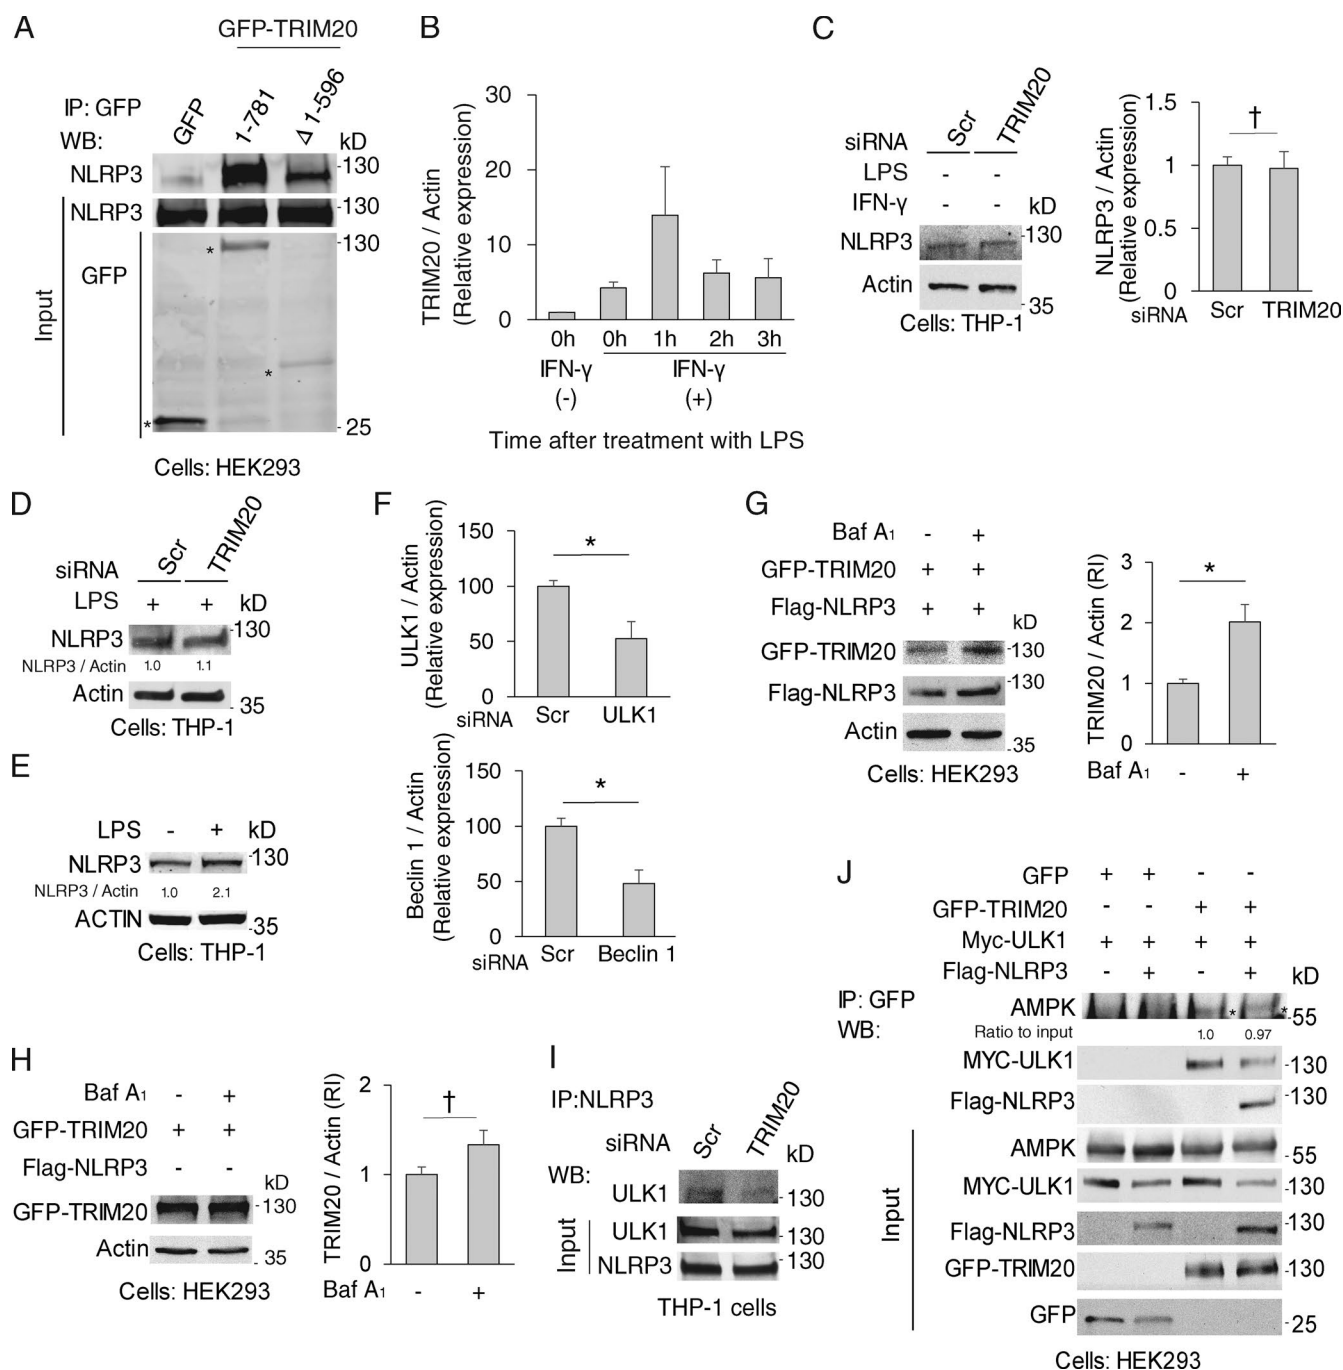

**Figure S3. TRIM20 degrades NLRP3 through autophagy.** (A) Coimmunoprecipitation analysis of deletion variants of TRIM20 (as GFP fusions; asterisks denote fusion products on the bottom blot) with NLRP3 in HEK293 cells. (B) THP-1 cells were treated with IFN- $\gamma$  for 3 h and additionally treated with 2.5  $\mu$ g/ml of LPS for indicated periods, and TRIM20 mRNA levels were determined by quantitative PCR. Values are standardized to IFN- $\gamma$ -untreated control. (C and D) Levels of NLRP3 in lysates from THP-1 cells untreated with IFN- $\gamma$  and subjected to TRIM 20 or scrambled (Scr) siRNA, untreated or treated with LPS as indicated. (E) THP-1 cells were treated with 1.0  $\mu$ g/ml of LPS for 3 h, and levels of NLRP3 in lysate were determined by immunoblots. (F) Knockdown efficacies of ULK1 and Beclin 1 by siRNA were examined by quantitative RT-PCR. (G and H) Levels of GFP-TRIM20 were determined in cells coexpressing (G) or not (H) NLRP3 after autophagy induction (EBSS, 3 h) in the presence or absence of bafilomycin A1 (Baf A1). RI, relative intensity. (I) Coimmunoprecipitation analysis of ULK1 in NLRP3 protein complexes in the presence and absence of TRIM20 knockdown. Lysates from THP-1 cells subjected to each knockdown and treatment of 200 U/ml IFN- $\gamma$  for 3 h with additional LPS (1.0  $\mu$ g/ml) treatment for 2 h followed by immunoprecipitation with anti-NLRP3. Immunoblots were probed as indicated. (J) Coimmunoprecipitation analysis of AMPK in GFP-TRIM20 complexes in HEK293T cells expressing Myc-ULK1 and Flag-NLRP3 (or not). Data, means  $\pm$  SE;  $n \geq 3$  experiments; \*,  $P < 0.05$ ; †,  $P \geq 0.05$  (C,  $t$  test; D, ANOVA). IP, immunoprecipitation; WB, Western blot.

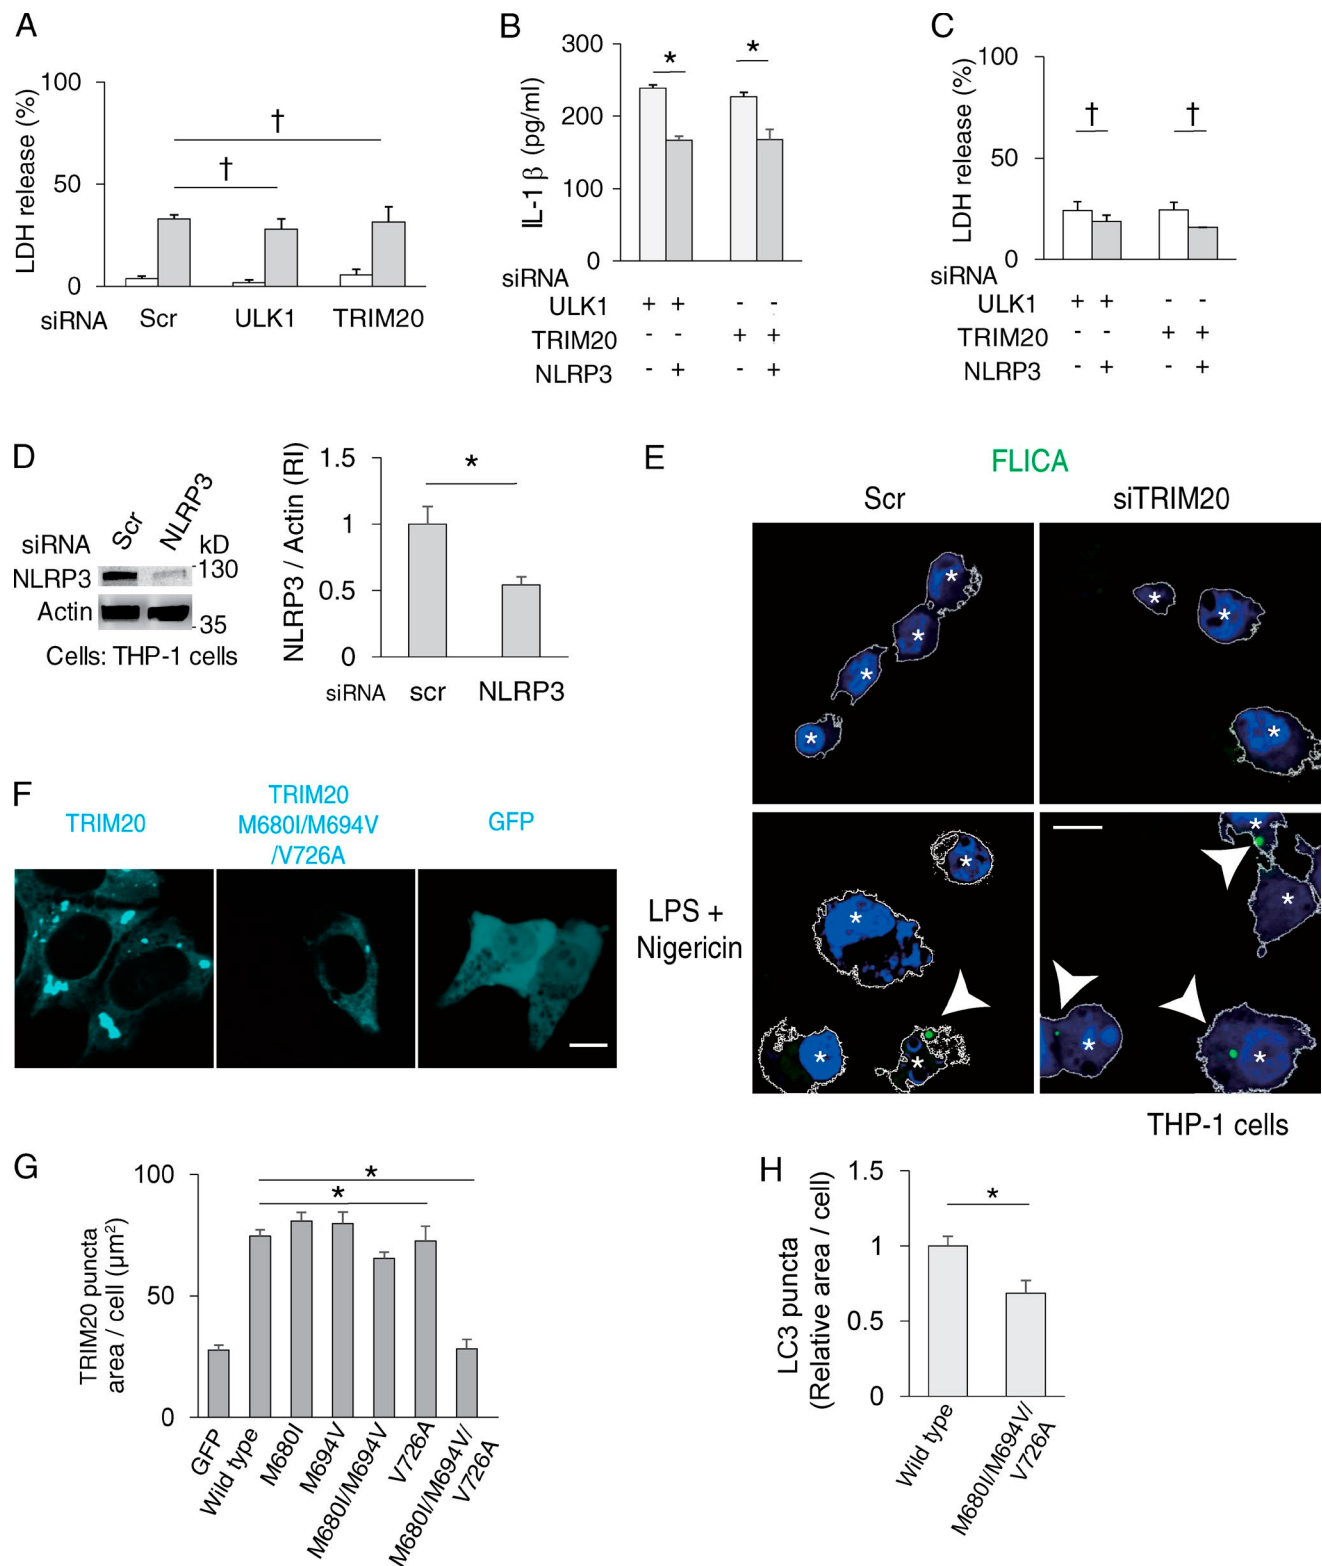

Figure S4. **Effects of TRIM20 on inflammasome activity and FMF-associated variants of TRIM20 decrease number of TRIM20 and LC3 puncta.** (A) LDH release of supernatants analyzed in Fig. 6 D. (B and C) Supernatants were harvested from THP-1 cells that had been subjected to double knockdowns as indicated, treated with IFN- $\gamma$  and LPS and additionally stimulated with nigericin (20  $\mu$ M) for 30 min. IL-1 $\beta$  and LDH release was measured. (D) Knockdown efficacy of NLRP3 by siRNA was examined by immunoblotting. RI, relative intensity. (E) Confocal microscopy of THP-1 cells that had been subjected to knockdown of TRIM20, treated with IFN- $\gamma$ , and then treated with or without LPS (2 h) and nigericin (10 min) and stained for active caspase-1 (FLICA) and nucleus (TO-PRO-3). Arrowheads, FLICA-positive puncta; asterisks, cell nuclei; white outline, cell boundary. (F) Confocal microscopy images of GFP-TRIM20 (wild-type or FMF-associated variants) or GFP in HEK293 cells. (G) HC image (epifluorescence) analysis of TRIM20 puncta in HeLa cells expressing GFP-TRIM20 (wild-type or FMF-associated variants) or GFP. (H) HC image analysis of LC3 puncta in HeLa cells expressing GFP-TRIM20 (wild-type or triple mutant TRIM20). Data, means  $\pm$  SE;  $n \geq 3$  experiments; \*,  $P < 0.05$ ; †,  $P \geq 0.05$  ( $t$  test or ANOVA). Scr, scrambled. Bars, 5  $\mu$ m.

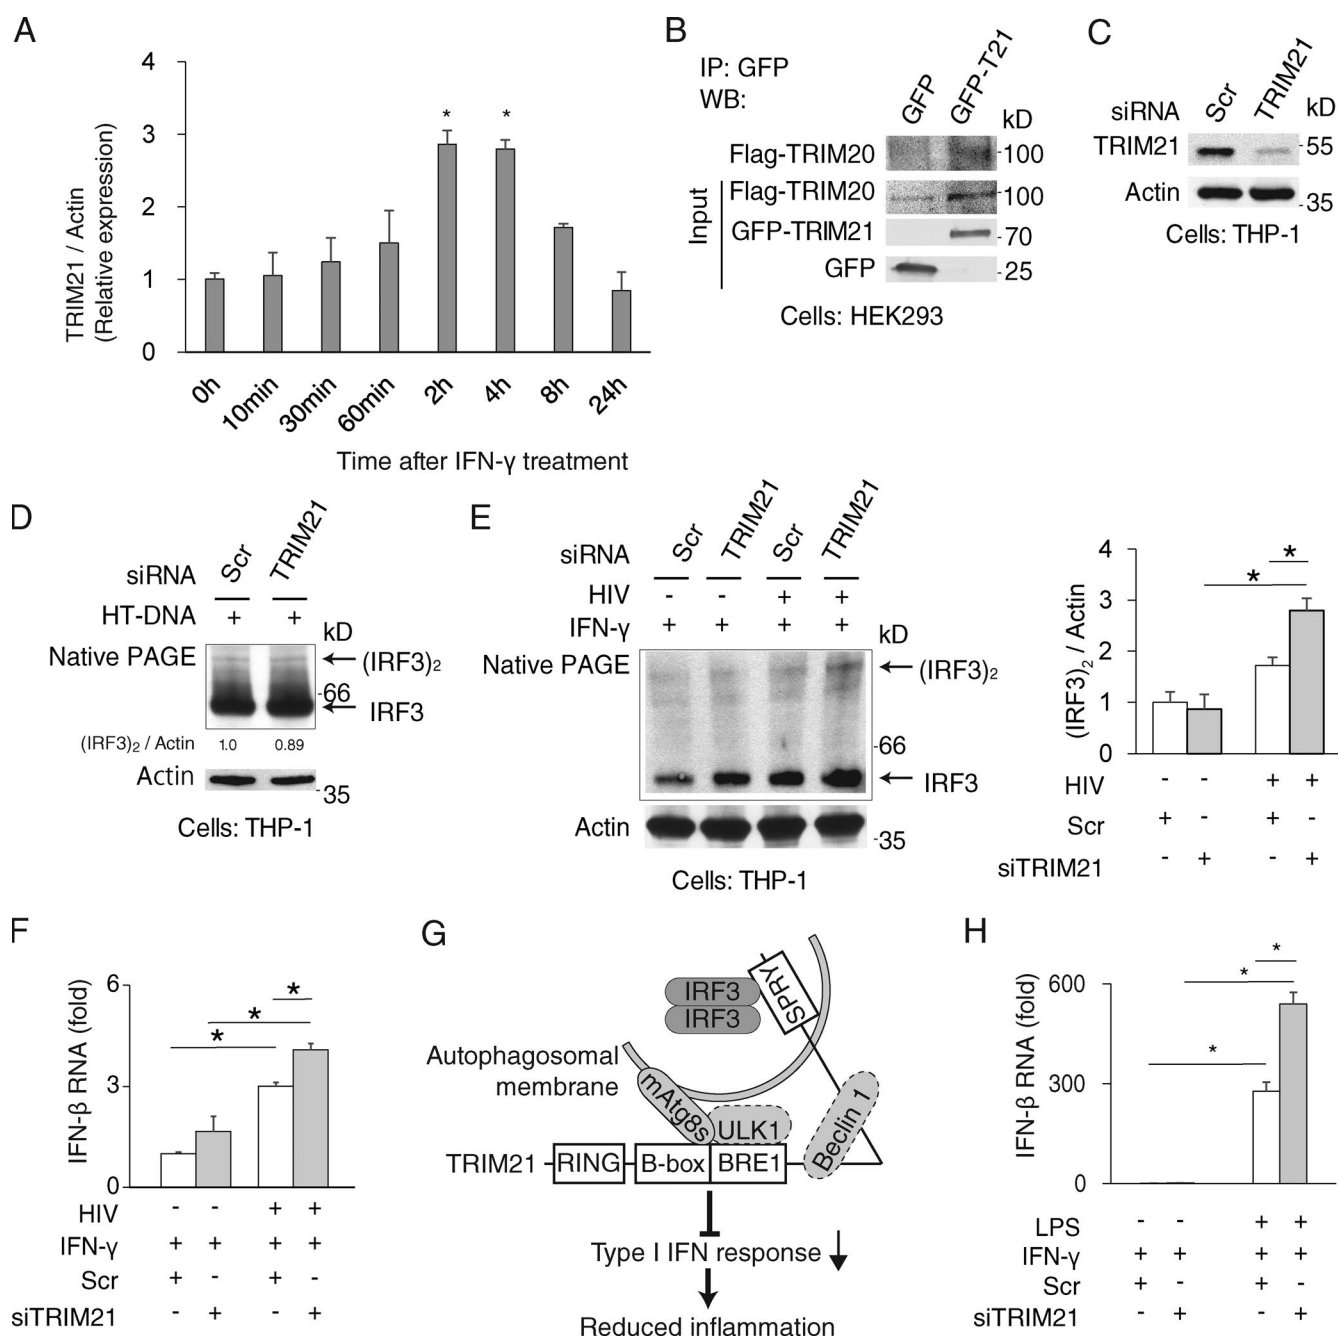

**Figure S5. TRIM21 affects the level of dimerized IRF3 in HIV1 infection.** (A) THP-1 cells were treated with 1,000 U/ml of IFN- $\gamma$  for indicated times, and TRIM21 mRNA levels were determined by quantitative RT-PCR. (B) Coimmunoprecipitation analysis of GFP-TRIM20 with Flag-TRIM21 in HEK293 cells extracts. (C) Knockdown efficacy of TRIM21 level was examined by immunoblotting. (D) Levels of dimerized IRF3 were assessed by native PAGE from THP-1 cells subjected to TRIM21 or control knockdown, untreated with IFN- $\gamma$ , and transfected with herring testis DNA (HT-DNA). (E and F) THP-1 cells subjected to TRIM21 or control knockdown were infected with a single-round infection HIV1 virus in the presence of 200 U/ml IFN- $\gamma$  for 20 h, and the levels of dimerized IRF3 (E) or mRNA levels of IFN- $\beta$  (F) were determined. (G) Model of TRIM21's dual function in autophagy as a regulator-receptor: TRIM21 assembles autophagy machinery (ULK1, Beclin 1, and mAtg8s) and recognizes substrates (dimerized IRF3) delivering them for autophagic degradation to suppress type I IFN response and inflammation. Dashed outlines (ULK1 and Beclin 1), domain binding location not mapped; solid outline for mAtg8 (GABARAP) reflects mapping data. (H) The effect of TRIM21 knockdown on IFN- $\beta$  mRNA levels after stimulation of THP-1 cells with 1,000 U/ml IFN- $\gamma$  for 3 h and then with 2.5  $\mu$ g/ml LPS for 2 h. Data, means  $\pm$  SE;  $n \geq 3$  experiments; \*,  $P < 0.05$  (ANOVA).
